# Supplementary material for: Optimal Timing of Simethicone Supplement for Bowel Preparation: A Prospective Randomized Controlled Trial
Source: Can J Gastroenterol Hepatol. 2021 Oct 27;2021:4032285. doi: 10.1155/2021/4032285 (PMC8566047; doi:10.1155/2021/4032285)
Supplement: Supplementary Materials — Figure S1. Bubble scale. A, 0 = bubbles have filled the entire lumen. B, 1 = bubbles have filled 25%–50% luminal diameter. C, 2 = bubbles have filled 5%–25% luminal diameter. D, 3 = no or minimal bubbles1. Figure S2. Boston Bowel Preparation Scale (BBPS). A, 0 = colon segment mucosa is not visible. B, 1 = a portion of the colonic mucosa is visible, while other areas are covered by residual stool. C, 2 = a minor amount of residual stool covers some segments of the colonic mucosa; however, other areas are adequately visible. D, 3 = colonic mucosa is adequately visible in all segments. [file 4032285.f1.docx]

**Optimal Timing of Simethicone Supplement for Bowel Preparation: A Prospective Randomized Controlled Trial**

Zhen-wen Wu1#, Sheng-gang Zhan1#, Mei-feng Yang2#, Yi-teng Meng1, Feng Xiong1, Cheng Wei1, Ying-xue Li1, Ding-guo Zhang1, Zheng-lei Xu1, Ben-hua Wu1, Rui-yue Shi1*, Jun Yao1*, Li-sheng Wang1* and De-feng Li1*

1. Department of Gastroenterology, Shenzhen People's Hospital (the Second Clinical Medical College, Jinan University; the First Affiliated Hospital, Southern University of Science and Technology), Shenzhen 518020, Guangdong, China
2. Department of Hematology, Yantian District People's Hospital, Shenzhen 518020, Guangdong, China


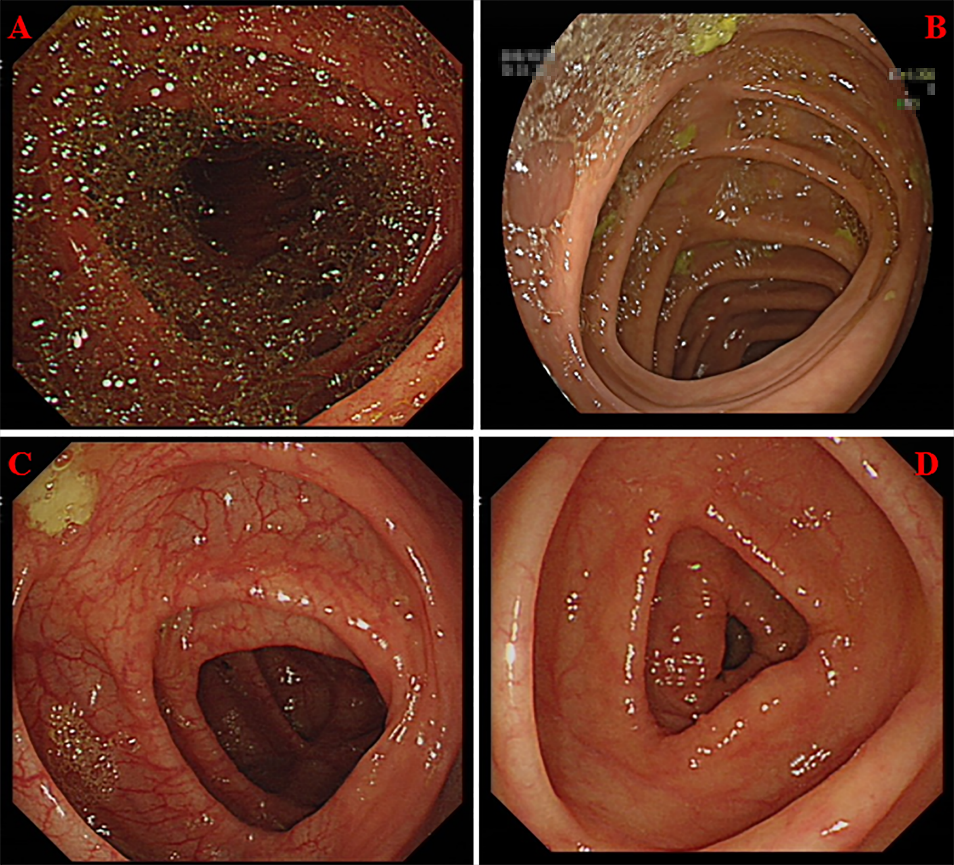


Figure S1. Bubble scale. A, 0 = Bubbles have filled the entire lumen. B, 1 = Bubbles have filled 25%–50% luminal diameter. C, 2 = Bubbles have filled 5%–25% luminal diameter. D, 3 = no or minimal bubbles1.


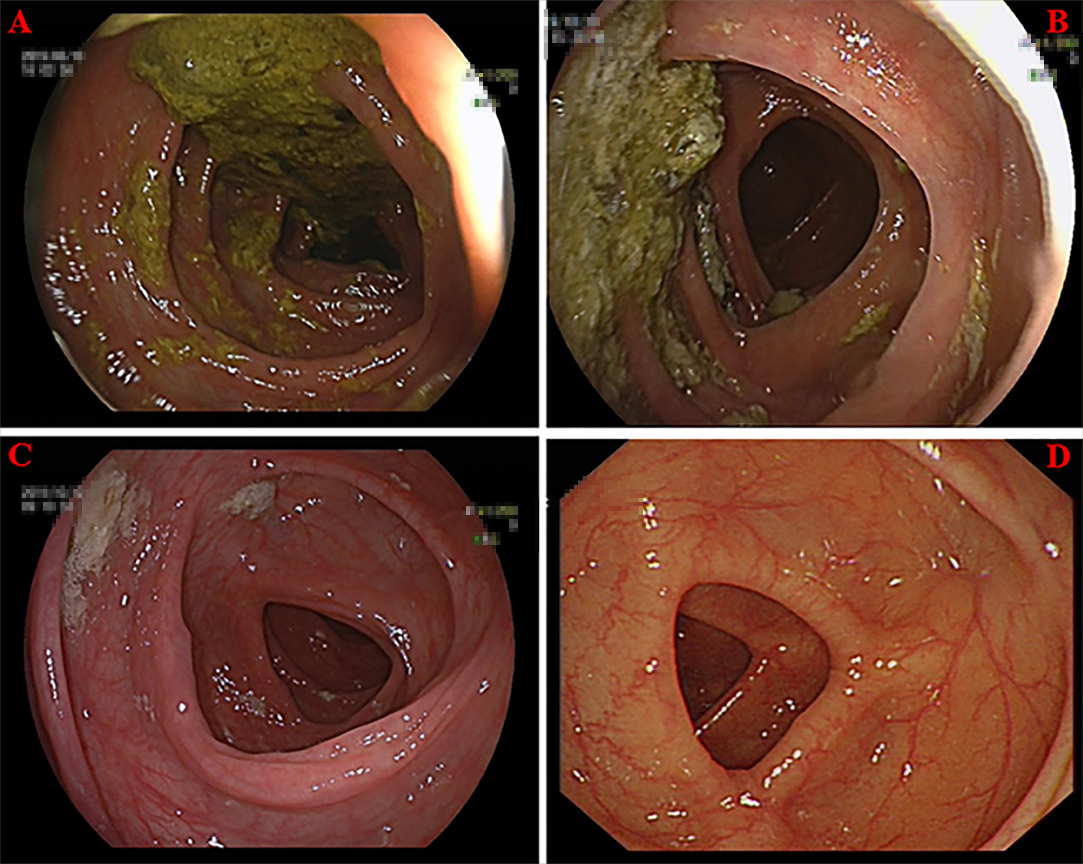


Figure S2. Boston Bowel Preparation Scale (BBPS). A, 0= Colon segment mucosa not visible. B, 1= A portion of colonic mucosa is visible, while other areas are covered by residual stool. C, 2= A minor amount of residual stool covers some segments of the colonic mucosa; however, other areas are adequately visible. D, 3 = Colonic mucosa is adequately visible in all segments1.

Reference

1. Li DF, Luo MH, Du QQ, et al. Efficacy of low-dose versus high-dose simethicone with polyethylene glycol for bowel preparation: A prospective randomized controlled trial. J Gastroenterol Hepatol 2020;35:1488-1494.
